# Supplementary material for: Mechanistic aspects of fluorescent gold nanocluster internalization by live HeLa cells
Source: Royal Society of Chemistry journal article supplement (doi:10.1039/c2nr33147k), 2012-12-14
Supplement: c2nr33147k.pdf [file c2nr33147k.pdf]

## Electronic Supplementary Information

### Mechanistic aspects of fluorescent gold nanocluster internalization by live HeLa cells

Linxiao Yang,<sup>a</sup> Li Shang<sup>\*a</sup> and G. Ulrich Nienhaus<sup>\*abc</sup>

<sup>a</sup>Institute of Applied Physics and Center for Functional Nanostructures (CFN), Karlsruhe Institute of Technology (KIT), Wolfgang-Gaede-Strasse 1, 76131 Karlsruhe, Germany.

<sup>b</sup>Institute of Toxicology and Genetics, Karlsruhe Institute of Technology (KIT), Hermann-von-Helmholtz-Platz 1, 76344, Eggenstein-Leopoldshafen, Germany.

<sup>c</sup>Department of Physics, University of Illinois at Urbana-Champaign, Urbana, Illinois 61801, USA.

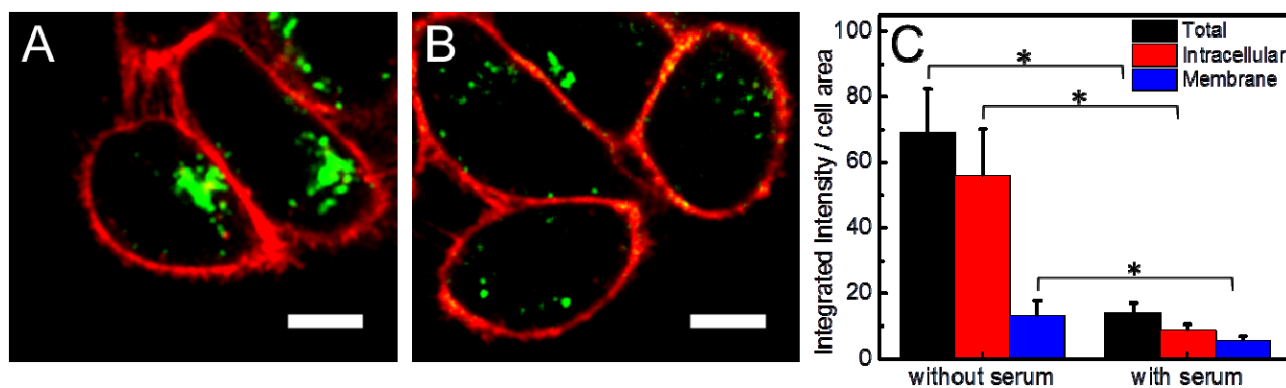

**Fig. S1** Confocal images of HeLa cells upon incubation with 20 μg/ml AuNCs (green) in serum-free DMEM (A) and DME complemented with 10% fetal bovine serum (B). Cell membranes were stained with CellMask<sup>TM</sup> DeepRed (red). Scale bar: 10 μm. (C) Quantitative analysis of the effect of serum on the AuNC uptake by HeLa cells. Total integrated intensity (black) of AuNCs per cell area and separation into intracellular (red) and membrane-associated (blue) AuNCs ( \* : p < 0.05).

\* Address correspondence to [li.shang@kit.edu](mailto:li.shang@kit.edu); [uli.nienhaus@kit.edu](mailto:uli.nienhaus@kit.edu).

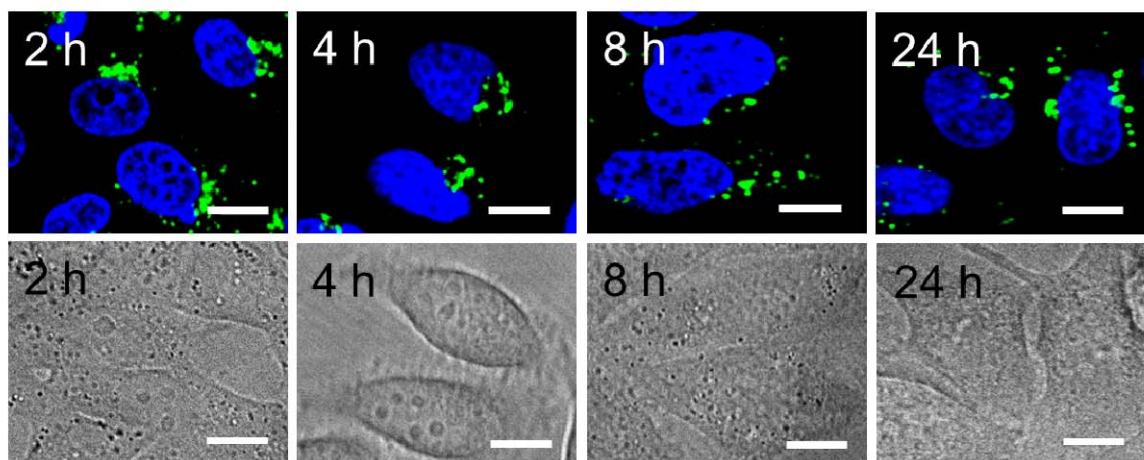

**Fig. S2** Confocal fluorescence (upper panel) and DIC (lower panel) images of HeLa cells labeled with the nuclear marker (Hoechst 33342, blue) upon AuNC (green) internalization for different times. The overlapped images clearly showed that AuNCs and the nucleus do not colocalize within 24 h. Scale bar: 10  $\mu\text{m}$ .
